# Supplementary material for: Effectiveness of Human–Artificial Intelligence Collaboration in Cephalometric Landmark Detection
Source: MDPI journal article supplement (doi:10.3390/jpm12030387), 2022-03-03
Supplement: s1 [file s1]

**Table S2.** Classification criteria for anatomical types.

| Variables | Type 1          | Type 2                | Type 3               | Type 4        |
|-----------|-----------------|-----------------------|----------------------|---------------|
| ANB       | 3.2–5.7°        | > 5.7°                | < 3.2°               |               |
|           | Class I, normal | Class II              | Class III            |               |
| SNA       | 79.4–83.2°      | > 83.2°               | < 79.4°              |               |
|           | Normal maxilla  | Prognathic maxilla    | Retrognathic maxilla |               |
| SNB       | 74.6–78.7°      | < 74.6°               | > 78.7°              |               |
|           | Normal mandible | Retrognathic mandible | Prognathic mandible  |               |
| ODI       | 74.5 ± 6.1°     | > 80.5°               | < 68.4°              |               |
|           |                 | Deep bite tendency    | Open bite tendency   |               |
| APDI      | 81.4 ± 3.8°     | < 77.6°               | > 85.2°              |               |
|           |                 | Class II tendency     | Class III tendency   |               |
| FHI       | 0.65–0.75       | > 0.75                | < 0.65               |               |
|           |                 | Short face tendency   | Long face tendency   |               |
| FHA       | 26.8–31.4°      | > 31.4°               | < 26.8°              |               |
|           |                 | High mandibular angle | Low mandibular angle |               |
| MW        | 2–4.5 mm        | 0 mm                  | < 0 mm               | > 4.5 mm      |
|           |                 | Edge-to-edge          | Anterior cross bite  | Large overjet |

#### Abbreviations:

ANB, angle between A-point, nasion and B-point

SNA, angle between sella, nasion and A-point

SNB, angle between sella, nasion and B-point

Overbite depth indicator (ODI), sum of the angle between the lines from A-point to B-point and from menton to gonion, and the angle between the lines from orbitale to porion and from posterior nasal spine to anterior nasal spine

Anteroposterior dysplasia indicator (APDI), sum of the angle between the lines from orbitale to porion and from nasion to pogonion, the angle between the lines from nasion to pogonion and from A-point to B-point, and the angle between the lines from orbitale to porion and from posterior nasal spine to anterior nasal spine

Facial height index (FHI), ratio of the posterior face height (distance from sella to gonion) to the anterior face height (distance from nasion to menton)

Frankfurt mandibular angle (FMA), angle between the lines from sella to nasion and from gonion to gnathion

Modified Wits Appraisal (MW), the distance between mandible 1 crown and maxilla 1 crown
