# Supplementary material for: Effectiveness of Human–Artificial Intelligence Collaboration in Cephalometric Landmark Detection
Source: MDPI journal article supplement (doi:10.3390/jpm12030387), 2022-03-03
Supplement: s1 [file s1]

**Table S1.** List of anatomical landmarks.

| No. | Landmarks             | Definition                                                                                                            |
|-----|-----------------------|-----------------------------------------------------------------------------------------------------------------------|
| 1   | Sella                 | Midpoint of the sella turcica or the hypophyseal/pituitary fossa                                                      |
| 2   | Porion                | Highest point on the roof of the left external auditory meatus                                                        |
| 3   | Basion                | Point at the center of the anterior border of foramen magnum at the base of the occipital bone                        |
| 4   | Hinge axis            | Center of rotation of the condyle                                                                                     |
| 5   | Pterygoid             | Eleven o'clock position from the pterygomaxillary fissure                                                             |
| 6   | Nasion                | Most anterior point on the frontonasal suture in the middle                                                           |
| 7   | Orbitale              | Lowest point on the inferior margin of the orbit, midpoint between the right and left images                          |
| 8   | A-point               | Deepest point on the curved bony outline between the anterior nasal spine and prosthion                               |
| 9   | PM                    | Point selected on the anterior border of the symphysis where the curvature changes between B-point and pogonion       |
| 10  | Pogonion              | Most anterior point on the symphysis of the mandible                                                                  |
| 11  | B-point               | Deepest midline point on the mandible between infradentale and pogonion                                               |
| 12  | Posterior nasal spine | Intersection of the continuation of the anterior wall of the pterygopalatine fossa and the nasal floor                |
| 13  | Anterior nasal spine  | Tip of the bony anterior nasal spine in the midline or median plane                                                   |
| 14  | R1                    | Deepest point on the curve of the anterior border of the ramus                                                        |
| 15  | R3                    | Most inferior point on the sigmoid notch of the ramus                                                                 |
| 16  | Articulare            | Intersection of the dorsal contours of the processus articularis mandibulare and os temporale                         |
| 17  | Menton                | Lowermost point on the chin contour                                                                                   |
| 18  | Maxilla 1 crown       | Tip of the maxillary incisor crown                                                                                    |
| 19  | Maxilla 1 root        | Tip of the maxillary incisor root                                                                                     |
| 20  | Mandible 1 crown      | Tip of the mandibular incisor crown                                                                                   |
| 21  | Mandible 1 root       | Tip of the mandibular incisor root                                                                                    |
| 22  | Maxilla 6 distal      | Distal contact point of the maxillary first molar                                                                     |
| 23  | Maxilla 6 root        | Distobuccal root of the maxillary first molar                                                                         |
| 24  | Mandible 6 distal     | Distal contact point of the mandibular first molar                                                                    |
| 25  | Mandible 6 root       | Distal root of the mandibular first molar                                                                             |
| 26  | Glabella              | Most prominent or anterior point in the midsagittal plane of the forehead at the level of the superior orbital ridges |
| 27  | Soft tissue nasion    | Most concave or retruded point in the tissue overlying the area of the frontonasal suture                             |

|    |                      |                                                                                                                                                                           |
|----|----------------------|---------------------------------------------------------------------------------------------------------------------------------------------------------------------------|
| 28 | Pronasale            | Most prominent or anterior point on the tip of the nose                                                                                                                   |
| 29 | Columella            | Most anterior point on the columella of the nose                                                                                                                          |
| 30 | Subnasale            | Point at which the nasal septum between the nostrils merges with the upper cutaneous lip in the midsagittal plane                                                         |
| 31 | Soft tissue A        | Point of greatest concavity in the midline of the upper lip between subnasale and labrale superius                                                                        |
| 32 | Upper lip            | Most anterior point on the margin of the upper membranous lip                                                                                                             |
| 33 | Stms                 | Lowermost midline point on the vermilion of the upper lip                                                                                                                 |
| 34 | Stmi                 | Uppermost midline point on the vermilion of the lower lip                                                                                                                 |
| 35 | Lower lip            | Most anterior point on the margin of the lower membranous lip                                                                                                             |
| 36 | Soft tissue B        | Point of greatest concavity in the midline of the lower lip between labrale inferius and soft tissue pogonion                                                             |
| 37 | Soft tissue pogonion | Most prominent or anterior point on the soft tissue chin in the midsagittal plane                                                                                         |
| 38 | Gnathion             | Most anterior-inferior point on the lateral shadow of the chin (usually best determined by selecting the midpoint between pogonion and menton on the contour of the chin) |
| 39 | Gonion               | Mediolateral midpoint on the posteriormost border of each gonial angle (gonion is a bilateral structure)                                                                  |
| 40 | APOcc                | Midpoint of the incisor overbite in occlusion                                                                                                                             |
| 41 | PPOcc                | Most distal point of contact between the most posterior molars in occlusion                                                                                               |
